# Supplementary material for: Rain on snow (ROS) understudied in sea ice remote sensing: a multi-sensor analysis of ROS during MOSAiC (Multidisciplinary drifting Observatory for the Study of Arctic Climate)
Source: Copernicus journal article supplement (doi:10.5194/tc-16-4223-2022), 2022-10-11
Supplement: Supplementary file 1 [file tc-16-4223-2022-supplement.zip]

Archive with 2 entries (2 files):
- M1_5mm_day.mp4
- tc-16-4223-2022-supplement-title-page.pdf
