# Supplementary material for: Rain on snow (ROS) understudied in sea ice remote sensing: a multi-sensor analysis of ROS during MOSAiC (Multidisciplinary drifting Observatory for the Study of Arctic Climate)
Source: Copernicus journal article supplement (doi:10.5194/tc-16-4223-2022), 2022-10-11
Supplement: Supplementary file 1 [file tc-16-4223-2022-supplement.zip › tc-16-4223-2022-supplement-title-page.pdf]

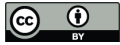

*Supplement of*

**Rain on snow (ROS) understudied in sea ice remote sensing: a multi-sensor analysis of ROS during MOSAiC (Multidisciplinary drifting Observatory for the Study of Arctic Climate)**

**Julienne Stroeve et al.**

*Correspondence to:* Julienne Stroeve ([julienne.stroeve@umanitoba.ca](mailto:julienne.stroeve@umanitoba.ca))

- [tc-16-4223-2022-supplement-title-page.pdf](#)
- [M1\\_5mm\\_day.mp4](#)

The copyright of individual parts of the supplement might differ from the article licence.
